# Supplementary material for: Genomic and cell-specific regulation of benzylisoquinoline alkaloid biosynthesis in opium poppy
Source: PubMed Central journal article supplement — J Exp Bot. 2024 Jul 24;76(1):35–51. doi: 10.1093/jxb/erae317 (PMC11659185; doi:10.1093/jxb/erae317), 2024-07-24
Supplement: erae317_suppl_supplementary_protocol_s1_figure_s1.pdf [file erae317_suppl_supplementary_protocol_s1_figure_s1.pdf]

## Supplementary Protocol

### RNA-seq data analysis and identification of tissue-specific genes and transcription factors

Publicly available RNA-seq data from the Jia et al. study (Jia *et al.*, 2023) was used to identify tissue-specific genes and transcription factors (TFs) in five distinct tissues: stem, root, capsule, leaf and petal (**Supplementary Table 1**). The quality of the raw RNA-seq data was assessed using FastQC v0.11.9. (Andrews, 2010) and adapters were trimmed (where applicable) using Trim Galore v0.6.7 (<https://github.com/FelixKrueger/TrimGalore>). The clean data was aligned against the *Papaver somniferum* reference genome (cv. HN1; accession number GWHAZPJ000000000.1) (Yang *et al.*, 2021) using HISAT2 v2.2.1 (Kim *et al.*, 2019). The mapped reads were sorted using Samtools v1.14 (Danecek *et al.*, 2021) and transcript per million (TPM) counts were generated using StringTie v2.1.3 (Pertea *et al.*, 2015). Principal component analysis (PCA) plots were generated in R v4.3.2 (R Core Team, 2013) using the log<sub>2</sub>-normalised TPM counts to identify any outliers and ensure that the biological replicates clustered according to tissue type. Tissue-specific genes and TFs were identified using the mean TPM counts of biological replicates for each tissue type and the tau (T) metric (Kryuchkova-Mostacci and Robinson-Rechavi, 2017); a gene was deemed to be tissue-specific if it had the highest mean TPM count in one tissue type relative to the others and had a corresponding  $T > 0.8$ . Heatmaps showing gene expression of tissue-specific genes were generated using the Z-score of log<sub>2</sub>-normalised mean TPM counts and the pheatmap package in R (Thimm *et al.*, 2004). TFs were annotated using iTAK v1.7a33 (Zheng *et al.*, 2016).

### Weighted gene co-expression network analysis (WGCNA)

Since co-expression may involve co-regulation, co-expression modules were generated to identify potential regulators (TFs) of known BIA biosynthesis pathway genes, especially the ones that are involved in the (*S*)-reticuline, noscapine and morphine pathways (**Supplementary Table S3**). First, gene-level quantification was performed on the mapped reads from the Jia et al. (2023) dataset using featureCounts from the Subread v2.0.6 package (Liao *et al.*, 2013, 2014). Genes with low expression variability ( $p$ -value 0.05) across samples were then filtered out using varianceBasedfilter from the R package DCGL (Liu *et al.*, 2010). A total of 13,037 (out of 55,316) genes remained; these genes were assigned to co-expression modules using the R package WGCNA (soft threshold =18; minClusterSize=50) (Langfelder and Horvath, 2008,

2012). Modules with similar gene expression profiles were merged (cutHeight=0.2) resulting in a total of 13 modules.

### **Gene regulatory network analysis**

WGCNA identified a large number of TFs that are co-expressed with known BIA biosynthesis pathway genes. However, it is unlikely that every TF identified is a potential regulator of BIA biosynthesis. In order to determine which of these TFs share a regulatory link with the genes of interest, gene regulatory networks (GRNs) were constructed using SCION v4.0 (default parameters; clustering=none) (Clark *et al.*, 2021). Since SCION requires a minimum of five samples/replicates to build a network and the Jia *et al.* (2023) dataset only had three stem samples, we also included the stem samples from the Guo *et al.* (2018) dataset (Guo *et al.*, 2018).

Given the highly tissue-specific nature of the BIA biosynthesis genes from the three selected pathways ((*S*)-reticuline, noscapine and morphine), two GRNs were generated: a stem-specific GRN and a root-specific GRN. The data used to build the stem-specific network was as follows: 1) row-normalised TPM values of genes expressed in stem tissue (SRA accessions: SRR15146387, SRR15146388, SRR15146389, SRR6782291, SRR6782298); 2) a list of target genes, including BIA biosynthesis genes, that are stem-specific ( $T > 0.8$ ) and found in co-expression modules (**Supplementary Table 2**); 3) a list of TFs that are stem-specific ( $T > 0.8$ ) and found in co-expression modules (**Supplementary Table S4**). BIA biosynthesis genes that did not meet the criteria for tissue-specificity or found in co-expression modules were also included in the list of targets (**Supplementary Table 4**). The above steps were repeated to build the root-specific GRN except that root-specific data (SRA accessions: SRR15146362, SRR15146363, SRR15146367, SRR15146384, SRR15146385, SRR15146386), including root-specific genes and TFs (**Supplementary Table 2**) was used as input instead. Four subnetworks were extracted from the two GRNs: a stem-specific morphine subnetwork, a root-specific morphine subnetwork, a root-specific noscapine subnetwork and a root-specific (*S*)-reticuline subnetwork. The subnetworks were visualised in Cytoscape v3.10.2 (Shannon *et al.*, 2003). For ease of visualisation, the subnetworks were filtered based on the following edge weight cut-offs (0.5 for the stem-specific subnetwork and 0.75 for the root-specific subnetworks).

## References

- Andrews S.** 2010. FastQC: a quality control tool for high throughput sequence data. Cambridge, United Kingdom.
- Clark NM, Nolan TM, Wang P, Song G, Montes C, Valentine CT, Guo H, Sozzani R, Yin Y, Walley JW.** 2021. Integrated omics networks reveal the temporal signaling events of brassinosteroid response in Arabidopsis. *Nature Communications* **12**, 5858.
- Danecek P, Bonfield JK, Liddle J, Marshall J, Ohan V, Pollard MO, Whitwham A, Keane T, McCarthy SA, Davies RM.** 2021. Twelve years of SAMtools and BCFtools. *Gigascience* **10**, giab008.
- Guo L, Winzer T, Yang X, Li Y, Ning Z, He Z, Teodor R, Lu Y, Bowser TA, Graham IA.** 2018. The opium poppy genome and morphinan production. *Science* **362**, 343-347.
- Jia Y, Xu Y, Wang B, Guo L, Guo M, Che X, Ye K.** 2023. The tissue-specific chromatin accessibility landscape of *Papaver somniferum*. *Frontiers in Genetics* **14**, 1136736.
- Kim D, Paggi JM, Park C, Bennett C, Salzberg SL.** 2019. Graph-based genome alignment and genotyping with HISAT2 and HISAT-genotype. *Nature Biotechnology* **37**, 907-915.
- Kryuchkova-Mostacci N, Robinson-Rechavi M.** 2017. A benchmark of gene expression tissue-specificity metrics. *Briefings in Bioinformatics* **18**, 205-214.
- Langfelder P, Horvath S.** 2008. WGCNA: an R package for weighted correlation network analysis. *BMC bioinformatics* **9**, 1-13.
- Langfelder P, Horvath S.** 2012. Fast R functions for robust correlations and hierarchical clustering. *Journal of statistical software* **46**.
- Liao Y, Smyth GK, Shi W.** 2013. The Subread aligner: fast, accurate and scalable read mapping by seed-and-vote. *Nucleic Acids Research* **41**, e108-e108.
- Liao Y, Smyth GK, Shi W.** 2014. featureCounts: an efficient general purpose program for assigning sequence reads to genomic features. *Bioinformatics* **30**, 923-930.
- Liu B-H, Yu H, Tu K, Li C, Li Y-X, Li Y-Y.** 2010. DCGL: an R package for identifying differentially coexpressed genes and links from gene expression microarray data. *Bioinformatics* **26**, 2637-2638.
- Pertea M, Pertea GM, Antonescu CM, Chang T-C, Mendell JT, Salzberg SL.** 2015. StringTie enables improved reconstruction of a transcriptome from RNA-seq reads. *Nature Biotechnology* **33**, 290-295.
- R Core Team R.** 2013. R: A language and environment for statistical computing.
- Shannon P, Markiel A, Ozier O, Baliga NS, Wang JT, Ramage D, Amin N, Schwikowski B, Ideker T.** 2003. Cytoscape: a software environment for integrated models of biomolecular interaction networks. *Genome research* **13**, 2498-2504.
- Thimm O, Bläsing O, Gibon Y, Nagel A, Meyer S, Krüger P, Selbig J, Müller LA, Rhee SY, Stitt M.** 2004. MAPMAN: a user-driven tool to display genomics data sets onto diagrams of metabolic pathways and other biological processes. *The Plant Journal* **37**, 914-939.
- Yang X, Gao S, Guo L, Wang B, Jia Y, Zhou J, Che Y, Jia P, Lin J, Xu T, et al.** 2021. Three chromosome-scale *Papaver* genomes reveal punctuated patchwork evolution of the morphinan and noscapine biosynthesis pathway. *Nature Communications* **12**, 6030.
- Zheng Y, Jiao C, Sun H, Rosli HG, Pombo MA, Zhang P, Banf M, Dai X, Martin GB, Giovannoni JJ.** 2016. iTAK: a program for genome-wide prediction and classification of plant transcription factors, transcriptional regulators, and protein kinases. *Molecular Plant* **9**, 1667-1670.

## Supplementary Figures

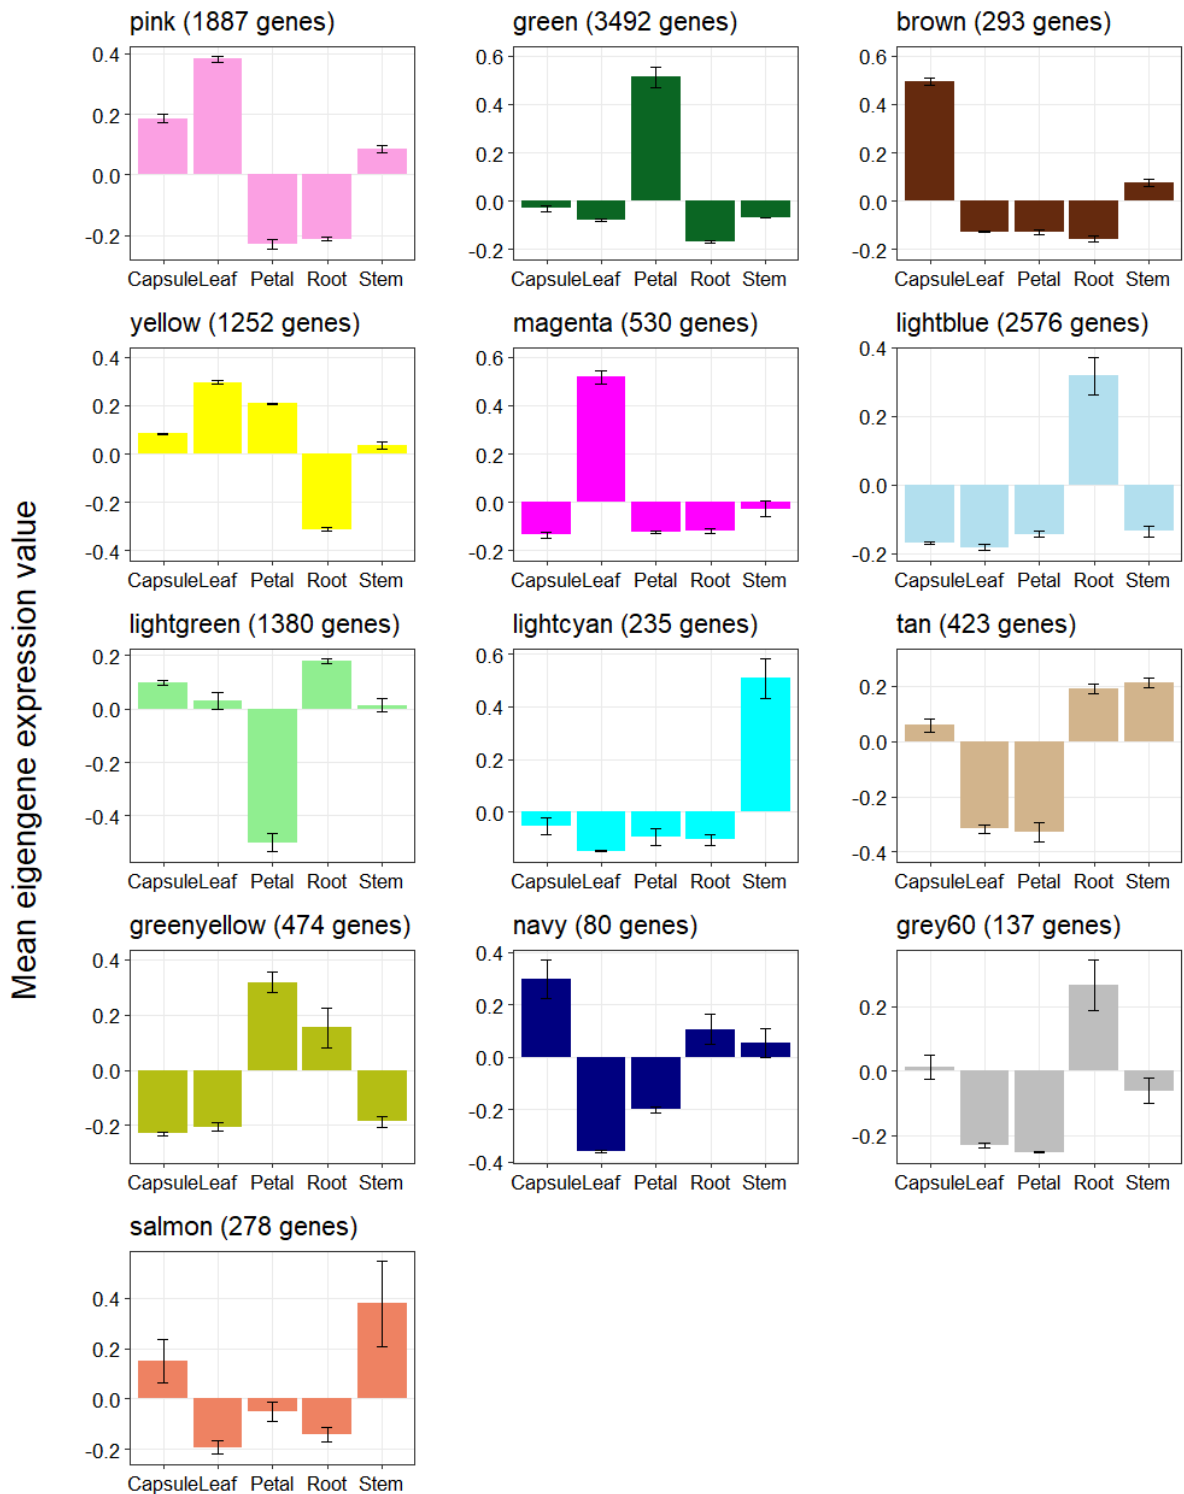

**Supplementary Figure 1.** Mean eigengene expression value for each tissue across the 13 co-expression modules identified by WGCNA. Numbers in parentheses represent the number of genes and transcription factors in each module. Values are mean  $\pm$  standard error.
